# Supplementary material for: Targeting myeloid cells in the tumor microenvironment enhances vaccine efficacy in murine epithelial ovarian cancer
Source: PubMed Central journal article supplement (PMC4484458; doi:10.18632/oncotarget.3597), 2015-03-14
Supplement: oncotarget-06-11310-s001.pdf [file oncotarget-06-11310-s001.pdf]

## Targeting myeloid cells in the tumor microenvironment enhances vaccine efficacy in murine epithelial ovarian cancer

### Supplementary Material

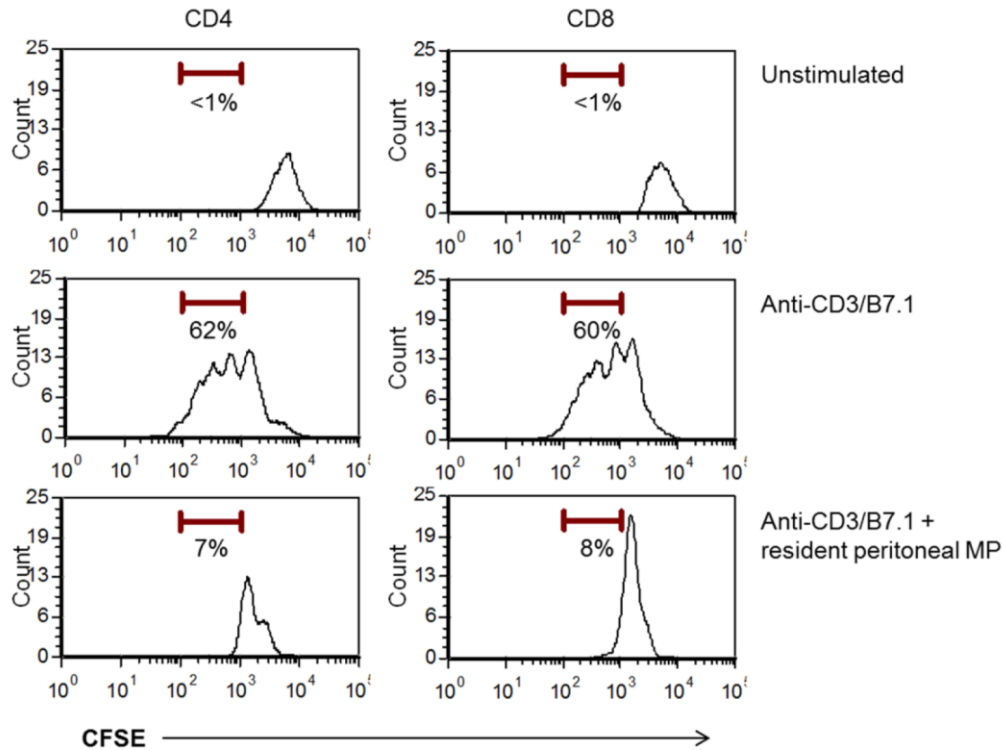

Supplemental Figure 1: Representative histograms show resident peritoneal macrophages (MP) abrogate anti-CD3/B7.1-stimulated CD4 and CD8 T cell proliferation. Column-purified peritoneal MP (F4/80<sup>+</sup>) from NTB mice were co-cultured with purified T cells from naïve mice (E:T ratio 1:1) in anti-CD3/B7.1-coated 96-well plates, as described in Fig. 1C. After 72 hours of culture, CD4<sup>+</sup> and CD8<sup>+</sup> T cell proliferation was assessed based on CFSE dilution. CFSE-labeled and unstimulated T cells were used as negative control. Percent positive T cells undergoing  $\geq 1$  division are shown.

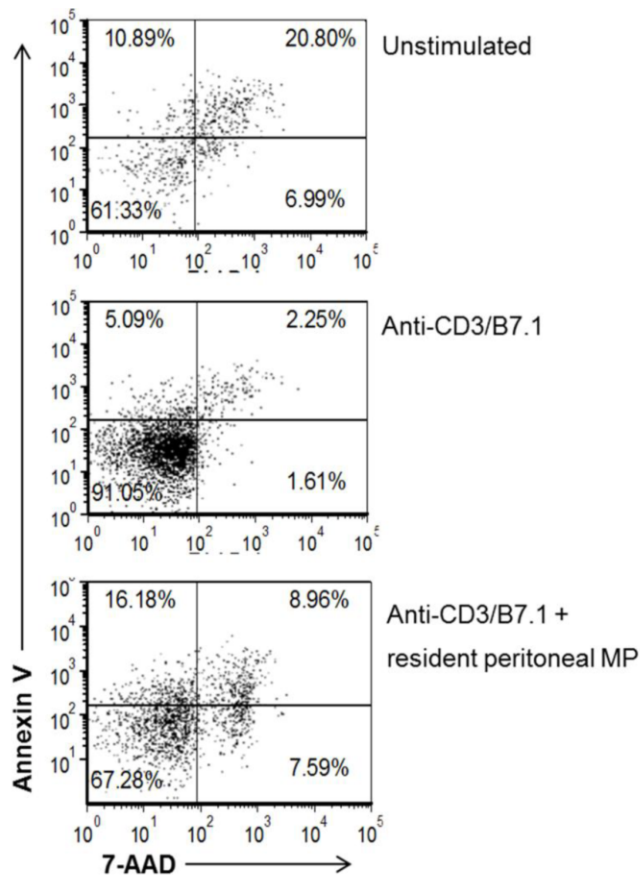

Supplemental Figure 2: Effect of resident peritoneal macrophages (MP) on viability of stimulated T cells. Splenic T cells from NTB mice were purified by negative selection, labeled with CFSE, and incubated as follows: unstimulated; anti-CD3/B7.1 stimulation; and anti-CD3/B7.1 stimulation with addition of column-purified resident peritoneal MP (F4/80<sup>+</sup>) from NTB mice (E:T ratio 1:1). After 72 hours of culture, total T cell populations were gated based on forward/side scatter, and cell death was assessed by annexin V and 7-AAD staining. The proportion of viable T cells (7-AAD<sup>-</sup>Annexin-V<sup>-</sup>) was highest in anti-CD3/B7.1-stimulated T cells, and modestly reduced in unstimulated conditions and following stimulation with anti-CD3/B7.1 in the presence of peritoneal MP. Representative plots show that the suppressive effect of peritoneal MP on stimulated T cell proliferation (as shown in Fig. 1) is not primarily driven by induction of T cell apoptosis. Results are representative of three separate experiments.

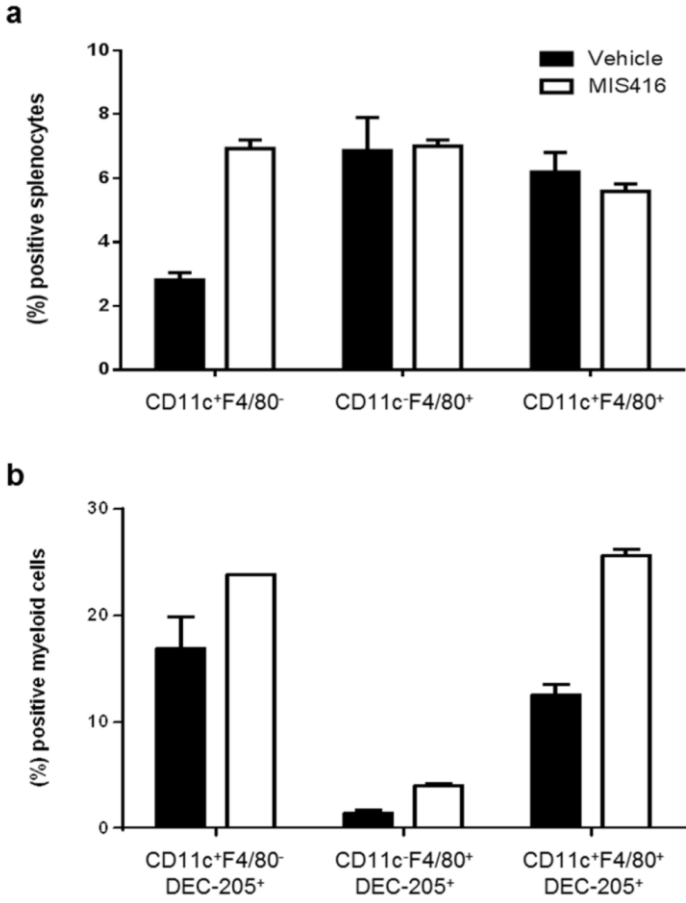

Supplemental Figure 3: MIS416 increases the proportion of splenic DCs and DEC-205-expressing cells in ovarian tumor-bearing mice. Mice were administered i.p. MOSEC-IE9, followed by adoptive OT-I transfer (day 30), MIS416/OVA or vehicle/OVA treatment (days 31 and 38), and were sacrificed on day 59. Splenocytes isolated from mice were analyzed by flow cytometry. Total cells were gated to obtain CD11c<sup>+</sup>F4/80<sup>-</sup>, CD11c<sup>-</sup>F4/80<sup>+</sup>, and CD11c<sup>+</sup>F4/80<sup>+</sup> cells (A); and those cells were further gated to obtain the proportion of DEC-205-expressing populations (B). Two separate experiments showed similar results (2 mice/group).

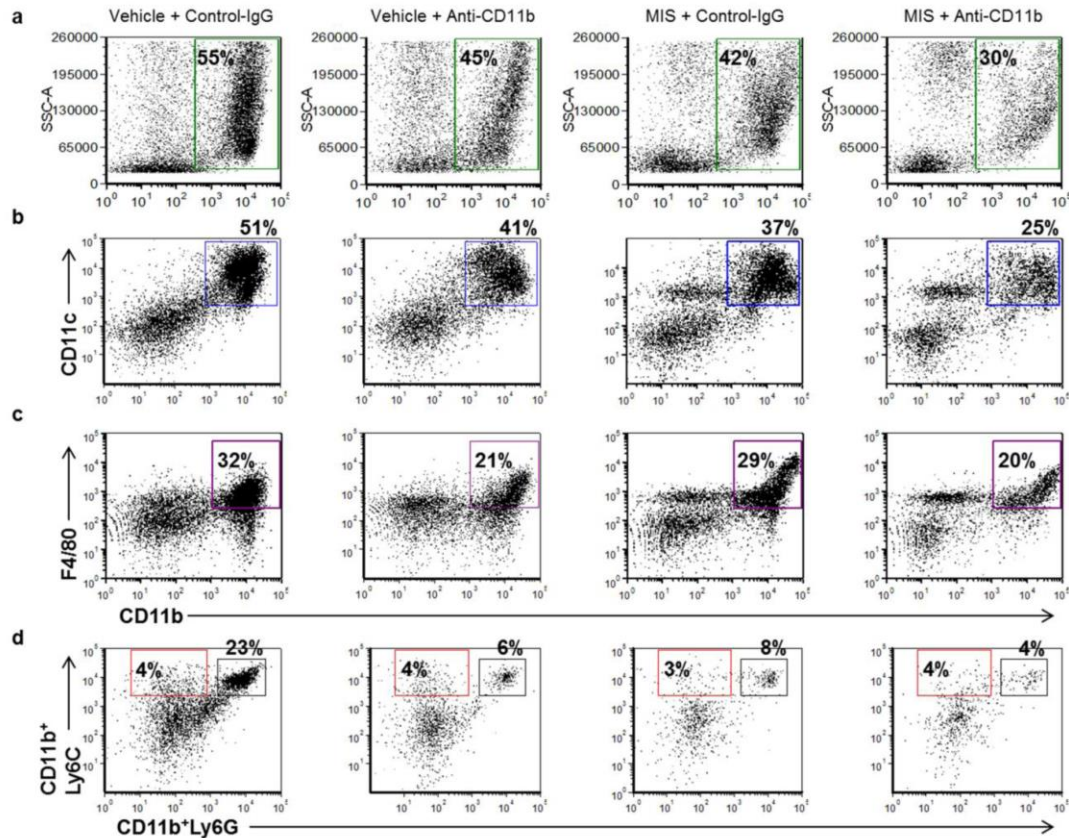

Supplemental Figure 4: Anti-CD11b mAb treatment following MIS416 administration partially depletes peritoneal myeloid cells in ovarian tumor-bearing mice. Mice were administered i.p. MOSEC-IE9, followed by adoptive OT-I transfer (day 30), MIS416/OVA or vehicle/OVA treatment (days 31 and 38), administration of anti-CD11b mAb or isotype-IgG (days 50 and 57), and were sacrificed on day 59. PECs isolated from mice were analyzed by flow cytometry. Representative dot plots (1 mouse/group) show that anti-CD11b mAb treatment partially depleted all myeloid subsets analyzed, with the major effect on the peritoneal granulocytic MDSCs (CD11b<sup>+</sup>Ly6G<sup>+</sup>Ly6C<sup>low</sup>). Two separate experiments (3 mice/group) showed similar results.
